# Supplementary material
Source: PubMed Central journal article supplement (PMC2668538)
Supplement: NIHMS75409-supplement-Supplemental_Figure_.pdf [file NIHMS75409-supplement-Supplemental_Figure_.pdf]

**Supplemental Figure A**

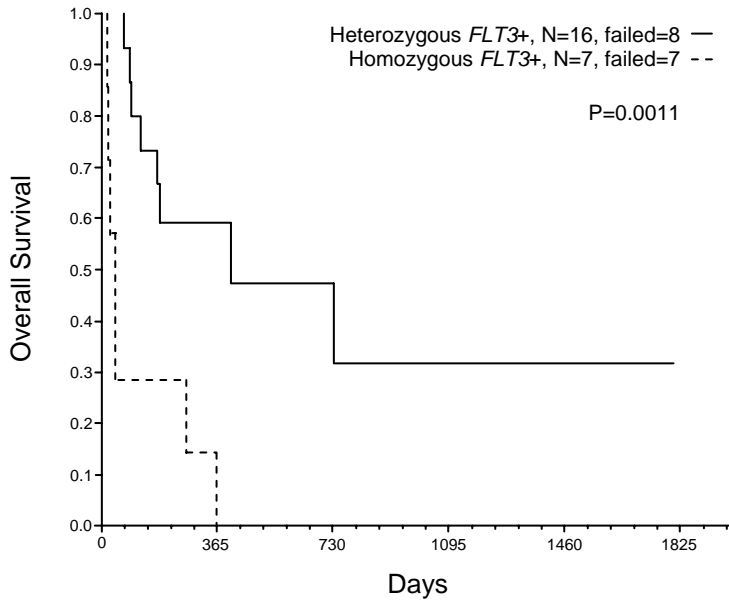

**Supplemental Figure A. Prognostic Impact of Homozygous *FLT3*-ITD Mutations due to Acquired UPD.** Kaplan-Meier analysis comparing patients heterozygous for a *FLT3*-ITD mutation (N=16; solid line) to those homozygous for a *FLT3*-ITD mutation due to acquired UPD (N=7; dotted line), regardless of treatment or remission/relapse.
