# Supplementary material
Source: PubMed Central journal article supplement (PMC2668538)
Supplement: NIHMS75409-supplement-Supplemental_Table_A.pdf [file NIHMS75409-supplement-Supplemental_Table_A.pdf]

**Supplemental Table A.** Regions of homozygosity found in controls.

| # | Cohort | Region         | Size    |
|---|--------|----------------|---------|
| 1 | HapMap | 2q32.3q33.1    | 7.7 Mb  |
| 2 | HapMap | 3q26.1         | 5.6 Mb  |
| 3 | HapMap | 6q22.1q22.31   | 6.5 Mb  |
| 4 | CCF    | 4q34.1q35.1    | 7.25 Mb |
| 5 | CCF    | 9p24.1p23      | 4.2 Mb  |
| 6 | CCF    | 13q14.11q21.31 | 22.4 Mb |
| 7 | CCF    | 13q21.3-q32.1  | 4.95 Mb |
| 8 | CCF    | 13q32.1q33.3   | 13.6 Mb |
| 9 | CCF    | 15q23q26.1     | 20.3 Mb |
